# Supplementary material for: Diversity of preferred nucleotide sequences around the translation initiation codon in eukaryote genomes
Source: PubMed Central journal article supplement — Nucleic Acids Res. 2007 Dec 17;36(3):861–71. doi: 10.1093/nar/gkm1102 (PMC2241899; doi:10.1093/nar/gkm1102), 2007-12-17
Supplement: nar_gkm1102_1.pdf [file nar_gkm1102_1.pdf]

Figure S1

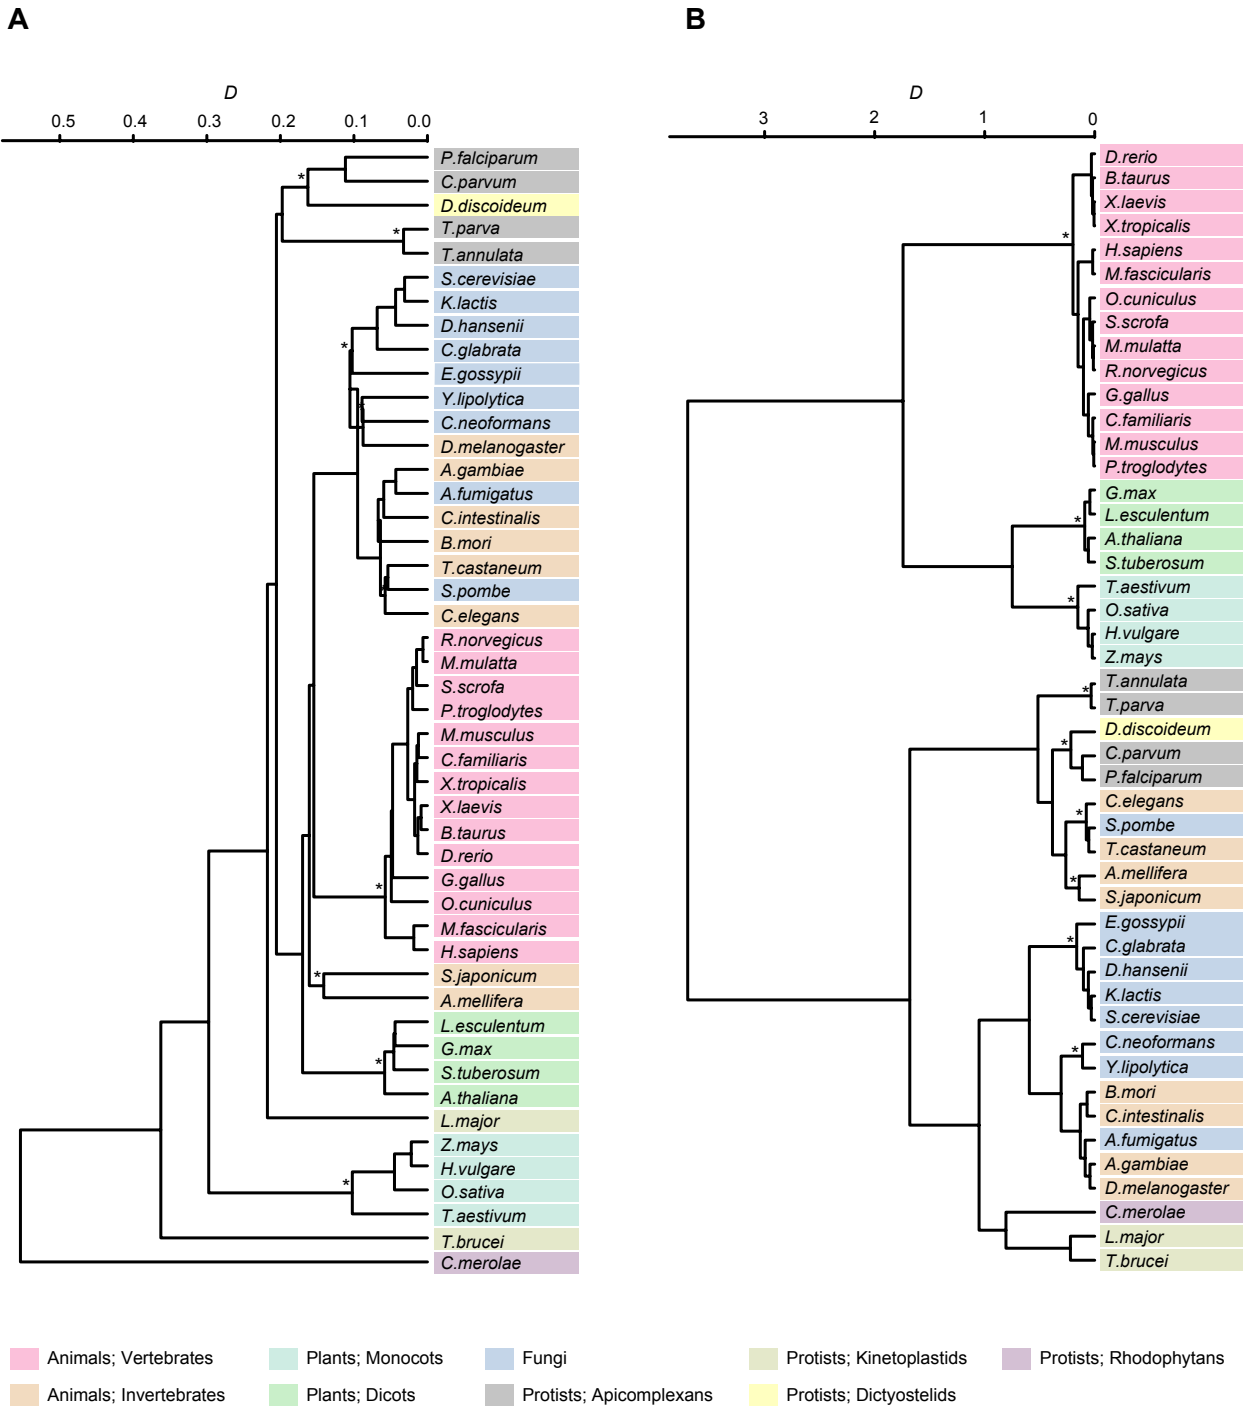

Figure S2

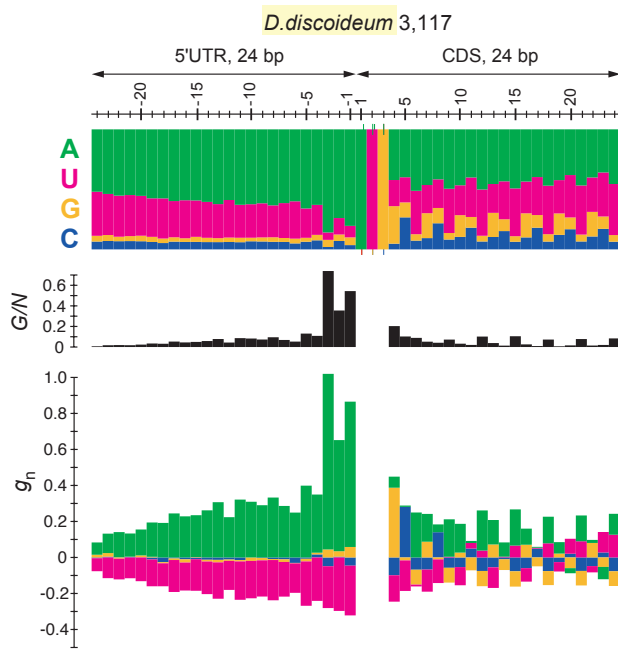

Figure S3

**A**

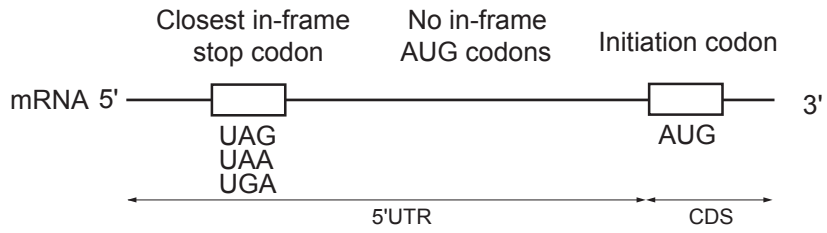

**B**

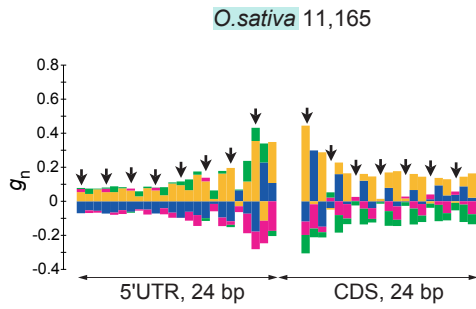

## Supplementary Information – Nakagawa *et al.*, 2007

**Figure S1.** Cluster dendrogram obtained by using the centroid method (**A**) and the Ward method (**B**).

The distance used ( $D$ ) was the same as that in Figure 3. An asterisk (\*) indicates a cluster that is conserved among the dendrograms obtained by three different clustering methods (see Figure 3).

**Figure S2.** Biases in nucleotide appearance for *D. discoideum*.

Top, middle, and bottom diagrams show the fraction of nucleotide appearance,  $G$ -values divided by  $N$  (3,117), and  $g_n$  values, respectively. See Figure 1.

**Figure S3.** Three-base periodicity in *O. sativa*.

**A.** *O. sativa* genes that were used for the analysis in (**B**). **B.** The nucleotide biases for *O. sativa* genes chosen by the criteria illustrated in (**A**). These genes also exhibited three-base periodicity. See Figure 5B.
