# Supplementary material for: Diversity of preferred nucleotide sequences around the translation initiation codon in eukaryote genomes
Source: PubMed Central journal article supplement — Nucleic Acids Res. 2007 Dec 17;36(3):861–71. doi: 10.1093/nar/gkm1102 (PMC2241899; doi:10.1093/nar/gkm1102), 2007-12-17
Supplement: nar_gkm1102_2.pdf [file nar_gkm1102_2.pdf]

Supplementary Information - Nakagawa *et al.*, 2007

**Table S1.** Observed and expected numbers of genes containing various trinucleotides

| Pattern       | <i>O</i> | <i>E</i> | <i>Z</i> | Rank |
|---------------|----------|----------|----------|------|
| <u>GCCAUG</u> | 11,724   | 5,254.8  | 90.3     | 1    |
| <u>AAAAUG</u> | 21,345   | 13,828.4 | 66.0     | 2    |
| <u>AAGAUG</u> | 12,692   | 9,515.6  | 33.3     | 3    |
| <u>TTTAUG</u> | 1,404    | 604.4    | 32.6     | 4    |
| <u>AGGAUG</u> | 5,394    | 3,848.9  | 25.1     | 5    |
| <u>CTGAUG</u> | 1,682    | 952.9    | 23.7     | 6    |
| <u>TTGAUG</u> | 1,637    | 1,003.7  | 20.0     | 7    |
| <u>ATCAUG</u> | 7,489    | 6,017.1  | 19.2     | 8    |
| <u>CTCAUG</u> | 1,768    | 1,250.9  | 14.7     | 9    |
| <u>ATTAUG</u> | 3,506    | 2,759.8  | 14.3     | 10   |

The genes used are the same as those in Table 4.
